# Supplementary material
Source: PubMed Central journal article supplement (PMC2533228)
Supplement: 0803055105_Appendix_PDF.pdf [file 0803055105_Appendix_PDF.pdf]

**Table S2. Upregulated miRNAs and CpG islands**

**57 different miRNAs upregulated  $\geq$  two-fold with minimal basal expression in untreated cells**

|               |               |               |              |
|---------------|---------------|---------------|--------------|
| hsa-miR-100   | hsa-miR-155   | hsa-miR-218-2 | hsa-miR-373  |
| hsa-miR-101-1 | hsa-miR-15b   | hsa-miR-219-1 | hsa-miR-373* |
| hsa-miR-101-2 | hsa-miR-17    | hsa-miR-219-2 | hsa-miR-425  |
| hsa-miR-106a  | hsa-miR-181a  | hsa-miR-220   | hsa-miR-429  |
| hsa-miR-126   | hsa-miR-192   | hsa-miR-221   | hsa-miR-494  |
| hsa-miR-126*  | hsa-miR-193a  | hsa-miR-222   | hsa-miR-516  |
| hsa-miR-132   | hsa-miR-193b  | hsa-miR-27b   | hsa-miR-7-2  |
| hsa-miR-135-1 | hsa-miR-196-1 | hsa-miR-29b-2 | hsa-miR-9-1  |
| hsa-miR-145   | hsa-miR-19a   | hsa-miR-301   | hsa-miR-92   |
| hsa-miR-147   | hsa-miR-205   | hsa-miR-30a   | hsa-miR-9-2  |
| hsa-miR-148a  | hsa-miR-21    | hsa-miR-32    | hsa-miR-9-3  |
| hsa-miR-148b  | hsa-miR-210   | hsa-miR-324   | hsa-miR-96   |
| hsa-miR-150   | hsa-miR-212   | hsa-miR-34b   |              |
| hsa-miR-151   | hsa-miR-213   | hsa-miR-34c   |              |
| hsa-miR-152   | hsa-miR-215   | hsa-miR-361   |              |

**27 different miRNAs upregulated  $\geq$  two-fold with minimal basal expression in untreated cells and located within a CpG island**

|              |               |              |             |
|--------------|---------------|--------------|-------------|
| hsa-miR-126  | hsa-miR-193b  | hsa-miR-27b  | hsa-miR-7-2 |
| hsa-miR-126* | hsa-miR-210   | hsa-miR-34b  | hsa-miR-9-1 |
| hsa-miR-132  | hsa-miR-212   | hsa-miR-34c  | hsa-miR-92  |
| hsa-miR-148a | hsa-miR-218-2 | hsa-miR-373  | hsa-miR-9-2 |
| hsa-miR-152  | hsa-miR-219-1 | hsa-miR-373* | hsa-miR-9-3 |
| hsa-miR-192  | hsa-miR-219-2 | hsa-miR-425  | hsa-miR-96  |
| hsa-miR-193a | hsa-miR-220   | hsa-miR-494  |             |

**7 DNA unmethylated CpG islands  
in the metastatic cell lines  
(corresponding to 8 miRNAs)**

hsa-miR-132/212  
hsa-miR-152  
hsa-miR-210  
hsa-miR-219-1  
hsa-miR-425  
hsa-miR-92  
hsa-miR-494

**11 DNA methylated CpG islands  
both in normal and cancer cells  
(corresponding to 13 miRNAs)**

hsa-miR-126/126\*  
hsa-miR-192  
hsa-miR-193a  
hsa-miR-193b  
hsa-miR-218-2  
hsa-miR-219-2  
hsa-miR-220  
hsa-miR-27b  
hsa-miR-373/373\*  
hsa-miR-7-2  
hsa-miR-96

**5 DNA methylated CpG islands  
only in cancer cells  
(corresponding to 6 miRNAs)**

hsa-miR-9-1  
hsa-miR-9-2  
hsa-miR-9-3  
hsa-miR-148a  
hsa-miR-34b/34c

**Table S4. Distribution of cases relating methylation, according to the presence or not of metastasis in the metastasis associated miRNAs (A) and frequency of CpG island hypermethylation of the metastasis-associated miRNAs according to the presence or absence of lymph node metastasis in different tumor types (B)**

**A**

|                     | miR-9-3    |               | miR-148a   |               | miR-34b/c  |               |
|---------------------|------------|---------------|------------|---------------|------------|---------------|
|                     | metastasis | no metastasis | metastasis | no metastasis | metastasis | no metastasis |
| <b>METHYLATED</b>   | 57 (77%)   | 35 (28.9%)    | 42 (65.7%) | 48 (47.1%)    | 46 (59%)   | 48 (37.2%)    |
| <b>UNMETHYLATED</b> | 17 (23%)   | 86 (71.1%)    | 22 (34.3%) | 54 (52.9%)    | 32 (41%)   | 81 (62.8%)    |
| <b>n</b>            | 74         | 121           | 64         | 102           | 78         | 129           |

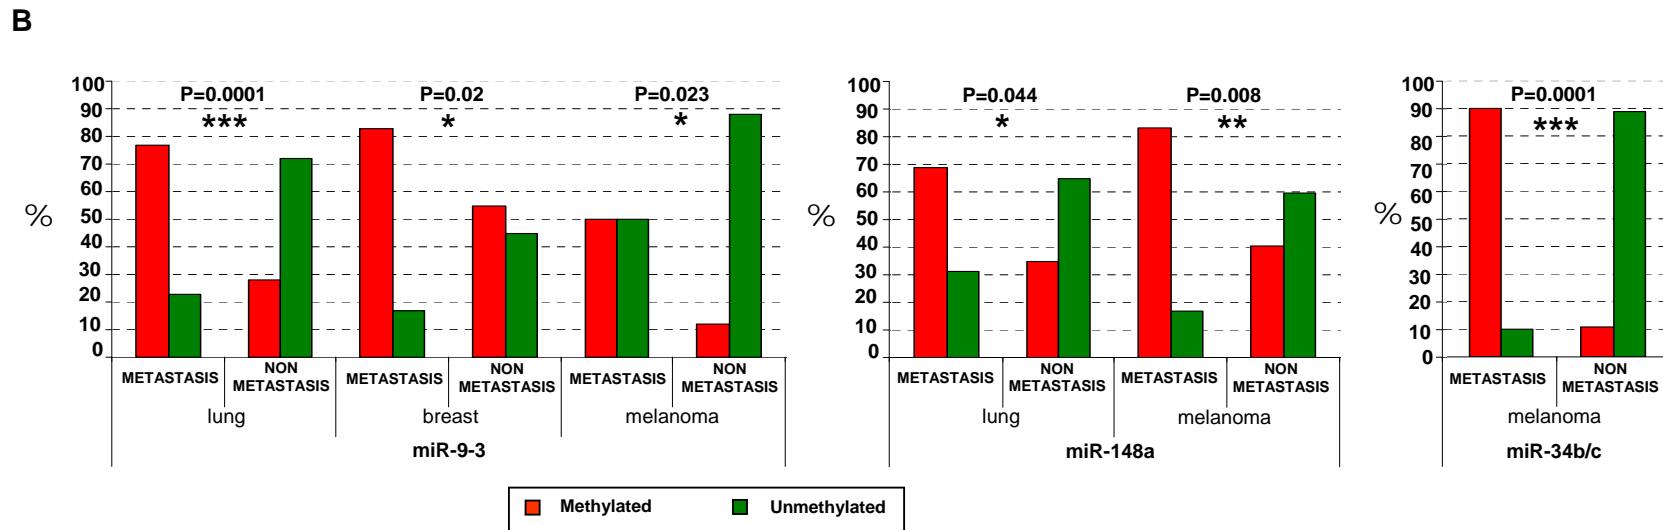

P values were calculated by using Pearson's  $\chi^2$  test is represented.
